# Supplementary material for: Metabolic engineering of Escherichia coli BL21 strain using simplified CRISPR-Cas9 and asymmetric homology arms recombineering
Source: PubMed Central journal article supplement (PMC8817497; doi:10.1186/s12934-022-01746-z), 2022-02-05
Supplement: 12934_2022_1746_MOESM1_ESM.pdf [file 12934_2022_1746_MOESM1_ESM.pdf]

1 Metabolic engineering of *Escherichia coli* BL21 strain  
2 using simplified CRISPR-Cas9 and Asymmetric  
3 Homology Arms recombineering

4

5 Sudha Shukal<sup>#</sup>, Xiao Hui Lim<sup>#</sup>, Congqiang Zhang, Xixian Chen<sup>\*</sup>

6 *Singapore Institute of Food and Biotechnology Innovation (SIFBI), Agency for Science, Technology*  
7 *and Research (A\*STAR), Singapore.*

8 <sup>#</sup> Both authors contribute equally.

9 <sup>\*</sup> To whom correspondence should be addressed.

10 Chen Xixian: SIFBI, A\*STAR, Proteos level 4, Singapore 138673;

11 Email: [xixian\\_chen@sifbi.a-star.edu.sg](mailto:xixian_chen@sifbi.a-star.edu.sg) or [xixian.chen@outlook.sg](mailto:xixian.chen@outlook.sg)

12

13 **Additional file 1**

14 Table S1. Knockout efficiencies of different gRNA designs to delete *adhE* from BL21  
15 genome and its *in silico* prediction [15]. Synthego: <https://www.synthego.com/>

| <i>adhE</i> | Knockout efficiencies | # Colonies | chopchop (based on K12) | on-target score (sythego) | Ranking (sythego) |
|-------------|-----------------------|------------|-------------------------|---------------------------|-------------------|
| gRNA1       | 1/15                  | 729±158    |                         | 0.417                     | 94                |
| gRNA2       | 10/16                 | 3503±28    | 64.65                   | 0.646                     | no rank           |
| gRNA3       | 14/15                 | 4666±6     | 37.71                   | 0.377                     | no rank           |
| gRNA4       | 12/16                 | 923±112    | 57.03                   | 0.57                      | 79                |
| gRNA5       | 0/16                  | 944±211    | 53.35                   | 0.534                     | 78                |

16

17 Table S2. Effect of tuning the recombinase expression levels on knockout efficiencies.  
 18 The gel images for the colony PCR results were shown. C: the PCR results using non-  
 19 edited cells as template. Both the deleted and non-deleted (WT) sizes are indicated as  
 20 arrows. Refer to table 2 for the plasmid description.

| adhE-gRNA | Cas Version | Inducers       | Colony forming units | Knockout efficiencies |
|-----------|-------------|----------------|----------------------|-----------------------|
| gRNA1     | pCas-V5     | 20mM Arabinose | 59                   | 0%                    |
|           | pCas-V6     | 20mM Arabinose | 99                   | 0%                    |
|           | pCas-V2     | 0.1mM IPTG     | 0                    | -                     |
|           | pCas-V2     | No inducers    | 0                    | -                     |
| gRNA3     | pCas-V5     | 20mM Arabinose | 4320                 | 100%                  |
|           | pCas-V6     | 20mM Arabinose | 5720                 | 100%                  |
|           | pCas-V2     | 0.1mM IPTG     | 180                  | 100%                  |
|           | pCas-V2     | No inducers    | 162                  | 100%                  |

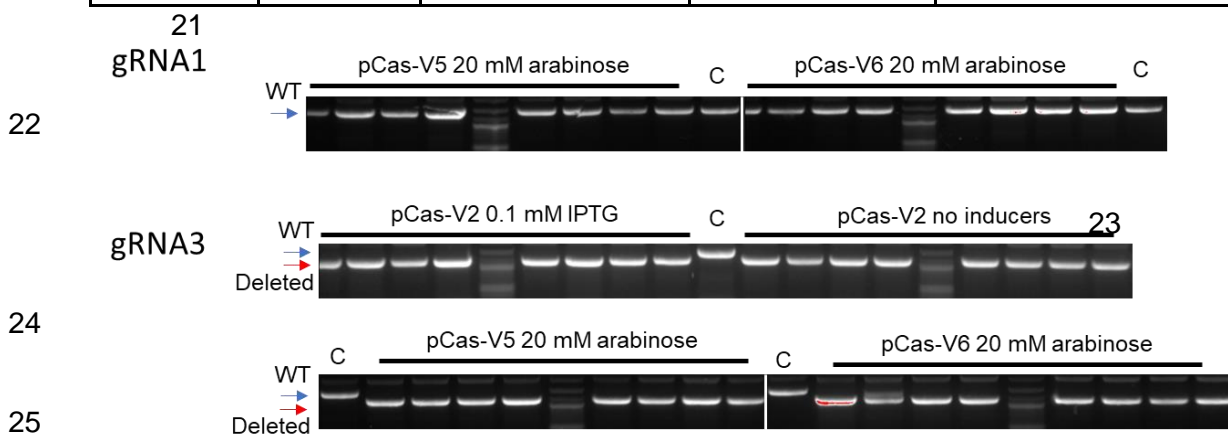

26 Table S3. Media and mean knockout efficiencies for the gene knockouts across the BL21  
27 genome.

|   | Gene direction | gRNA targeting strand | Proximate gene end | Median KO efficiency | Mean KO efficiency |
|---|----------------|-----------------------|--------------------|----------------------|--------------------|
| 1 | Forward        | -                     | 3'                 | 0.625                | 0.62               |
| 2 | Forward        | -                     | 5'                 | 0.75                 | 0.71               |
| 3 | Forward        | +                     | 3'                 | 0.5                  | 0.46               |
| 4 | Forward        | +                     | 5'                 | 0.25                 | 0.38               |
| 5 | Reverse        | -                     | 3'                 | 0.75                 | 0.67               |
| 6 | Reverse        | -                     | 5'                 | 0.25                 | 0.45               |
| 7 | Reverse        | +                     | 3'                 | 0.16                 | 0.32               |
| 8 | Reverse        | +                     | 5'                 | 0.75                 | 0.6                |

28

29

30

31

32

33

34 Table S4. Comparisons of genome editing methods tested in the *E. coli* BL21 strains by CRISPR-Cas system. pCas / pTargetF system,  
 35 which our system is based on, is also included.

|                                          | pCas / pTargetF system            | pEcCas / pEcgRNA system                                                              | pCasRed / pCRISPR-SacB-gRNA system | CRASH              |
|------------------------------------------|-----------------------------------|--------------------------------------------------------------------------------------|------------------------------------|--------------------|
| Reference                                | Jiang et al. 2015                 | Li et al. 2021                                                                       | Zerbini et al. 2017                | Our work           |
| Tested host                              | Mg1655<br><i>Tatumella citrea</i> | BL21(DE3), BL21 Star™ (DE3), MG1655, DH5α, CGMCC3705, Nissle1917, ATCC9637, DSM13699 | BL21 ΔompA (DE3)                   | BL21 (DE3), MG1655 |
| pCas or equivalent plasmid size          | 12545 bp                          | 14605 bp                                                                             | N.A.                               | 11066 bp           |
| Deletion length                          | N.A.                              | 0.1-5.6 kb                                                                           | 0.03 - 2.3 kb                      | 0.2-10 kb          |
| Max length tested in BL21                | N.A.                              | 2.5 kb                                                                               | 2.3 kb                             | 3.4 kb             |
| Positive rate for the max length deleted | N.A.                              | 1/2 (50%)                                                                            | 5/23 (14%)                         | 2/2 (100%)         |

|                                               |                    |                 |                               |              |
|-----------------------------------------------|--------------------|-----------------|-------------------------------|--------------|
| Duration (cloning, transformation and curing) | 7.5 days           | 5.5 days        | N.A.                          | 6 days       |
| <i>Homology arm</i>                           |                    |                 |                               |              |
| DNA fragment                                  | Yes*               | Yes             | Yes                           | Yes          |
| Amount transformed                            | 400 ng             | 400 ng          | 1-10 µg                       | 100 ng       |
| Preparation time                              | ≥ 4 h**            | ≥ 4 h**         | > 1 day***                    | 1.5-2 h      |
| Generating the homology arm                   | overlapping PCR    | overlapping PCR | Anneal 70-120nt synthetic DNA | one-step PCR |
| PCR products                                  | Multiple bands**** | Multiple bands  | N.A.                          | Single band  |
| Number of primers required                    | 4                  | 4               | N.A.                          | 2            |

36 \*protocol mainly tested with homology arm cloned in pTargetF plasmid.

37 \*\* Time includes PCR and purification

38 \*\*\* DNA synthesis and shipping takes 1 day

39 \*\*\*\*DNA yield may suffer due to non-specific bands and gel purification

40 Figure S1. Multiplex knockout of *adhE* and *ldhA* genes simultaneously. The plasmid  
41 pTarget construct carrying 2 sgRNA expression cassettes is illustrated. Gel images of  
42 colony PCR results are shown. The same colonies were tested for both *adhE* and *ldhA*  
43 deletion. C: the PCR results using non-edited cells as template. Both the deleted and non-  
44 deleted (WT) size are indicated as arrows.

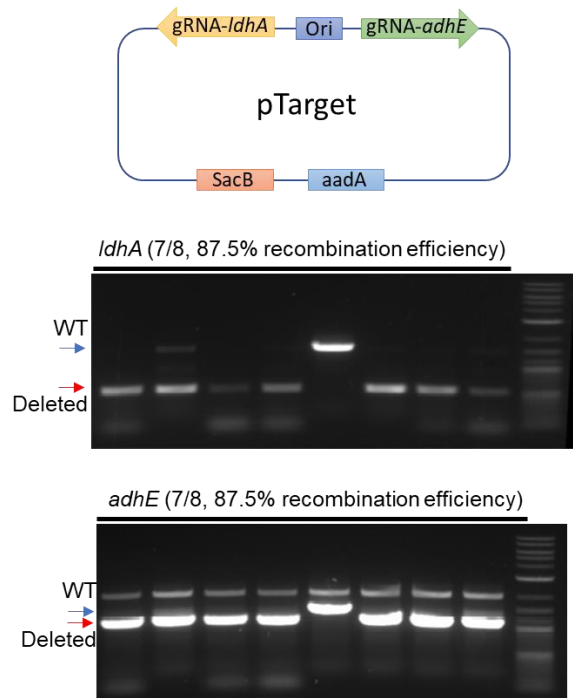

45

46

47

48 Figure S2. Illustration of the 6-day CRASH protocol. Please refer to materials and methods for details. The RF cloning method is used  
49 to mutate the gRNA sequences in the pTarget plasmid. To obtain asymmetric homology arms, the forward primer is a fusion of the  
50 upstream homology arm (40-45 bp) and downstream homology arm (15-20 bp). The 15-20 bp downstream homology arm is for  
51 annealing during initial cycles of PCR, and its length is chosen based on  $T_m \sim 50^\circ\text{C}$ . The reverse primer is a normal PCR primer about  
52 15-20bp with  $T_m \sim 50^\circ\text{C}$ . The length of downstream homology arms can be varied based on the reverse primer chosen. For this study,  
53 the downstream homology arm length was kept at 500 bp. While preparing the pTarget and homology arms, the pCas plasmid can be  
54 transformed into BL21 cells, and electrocompetent cells (ECC) can be prepared. Subsequently, the pTarget and homology arms can  
55 be transformed into BL21 cells overexpressing Cas9 protein and plate on LB + Spec + Kan agar. The next day, when colonies are  
56 formed, colony PCR is carried out to screen for positive clones. The positive clone is then inoculated into LB+Spec + Kan liquid media,  
57 and the cell culture is plated on LB+5% sucrose agar plate and incubated at  $42^\circ\text{C}$  overnight to cure both plasmids. The cured colonies  
58 are then verified by testing their growth LB, LB+Spec, and LB+Kan (12h). Alternatively, the cell culture is plated on LB+Kan+5% sucrose  
59 agar plate and incubated at  $42^\circ\text{C}$  overnight to cure the pTarget plasmid. The cured colonies can then be verified by testing their growth  
60 LB+Spec+Kan, and LB+Kan (12h).

61

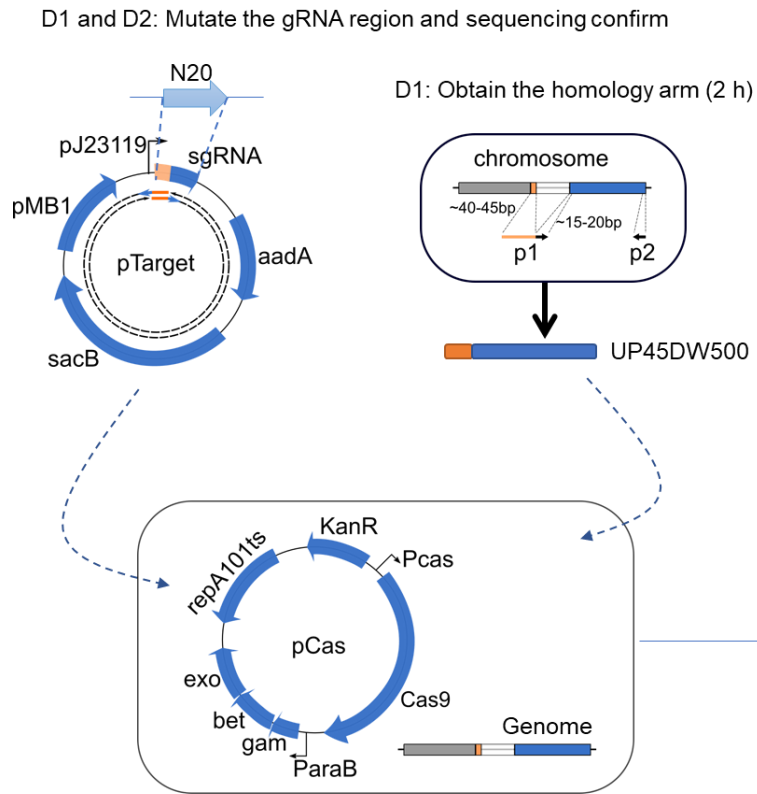

D1: transform pCas plasmid and plate on LB+Kan agar  
 D2: Pick single colony to grow up  
 D3: Make ECC and Transform the pTarget and homology arm

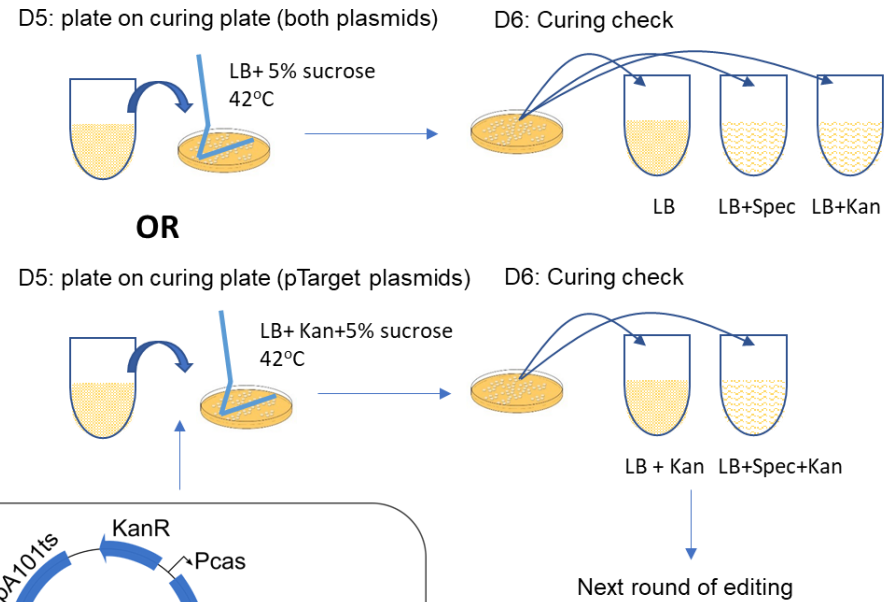

D4: Colony PCR and inoculate in LB +Spec + Kan
